# Supplementary material
Source: Research Square preprint supplement (doi:10.21203/rs.3.rs-9980478/v1)
Supplement: Supplementary file 1 [file 69a5f78cc723cf99c7b96f50.docx]

**Supplementary materials**

**Fractionation of the Peptide signal into 10 peptide classes of calibrated MW**

**Table 1** Characteristics of the 10 custom peptides classes defined specifying their MW ranges, expected number of peptidic AAs in the peptide chain, and elution time ranges

| **Classes** | **Class 1** | **Class 2** | **Class 3** | **Class 4** | **Class 5** | **Class 6** | **Class 7** | **Class 8** | **Class 9** | **Class 10** | **-** |
| --- | --- | --- | --- | --- | --- | --- | --- | --- | --- | --- | --- |
| **(g/mol)** | 8270 | 5789 | 4054 | 2834 | 1985 | 1388 | 972 | 680 | 476 | 333 | 233 |
|  | 67.9 | 46.4 | 32.4 | 22.6 | 15.8 | 11.0 | 7.7 | 5.3 | 3.7 | 2.5 | 1.8 |
| **Elution time**  **(min)** | 13,0 | 15,5 | 18,0 | 20,5 | 23,0 | 25,5 | 28,0 | 30,5 | 33,0 | 35,5 | 38,0 |

**MW distribution of keratin hydrolysates**

**Fig. 1** Peptides MW distribution of hydrolysates from experiment E12 as determined by the proposed SE-HPLC methodology

**Results of the calibration of the Superdex Increase column – Peptides**

**Table 2** The retention times, MWs and sequences of all 26 peptide standards

| **Peptide standards** | **Molecular weights MWs (g/mol)** | **Retention**  **times (min)** |
| --- | --- | --- |
| CHIIITTPPS | 1081.30 | 24.113 |
| CEHPTTGPQPPS | 1364.46 | 24.499 |
| CGHHHNP | 800.85 | 25.561 |
| HPPTWYHWGHSGHS | 1685.76 | 26.702 |
| LLLNQTVGHS | 1081.25 | 27.992 |
| HHLPPTV | 799.94 | 28.481 |
| RAERKAKE | 987.12 | 28.663 |
| NHMMMGHS | 1082.24 | 28.875 |
| FFFGPWGPQ | 1082.24 | 29.347 |
| FGGHPTWGHS | 1082.15 | 29.790 |
| KRTLR | 627.83 | 30.410 |
| FGPPPTW | 800.92 | 31.204 |
| AAGHMQW | 799.42 | 31.634 |
| RIY | 450.54 | 33.802 |
| RIY | 450.53 | 34.063 |
| EHNT | 499.48 | 34.265 |
| IF | 278.35 | 34.742 |
| TL | 232.28 | 35.115 |
| LY | 294.35 | 35.949 |
| AM | 220.29 | 36.127 |
| DF | 280.28 | 36.769 |
| KW | 332.40 | 36.845 |
| GGG | 189.17 | 37.556 |
| DY | 296.28 | 38.325 |
| SY | 268.27 | 38.394 |
| GG | 132.12 | 38.591 |


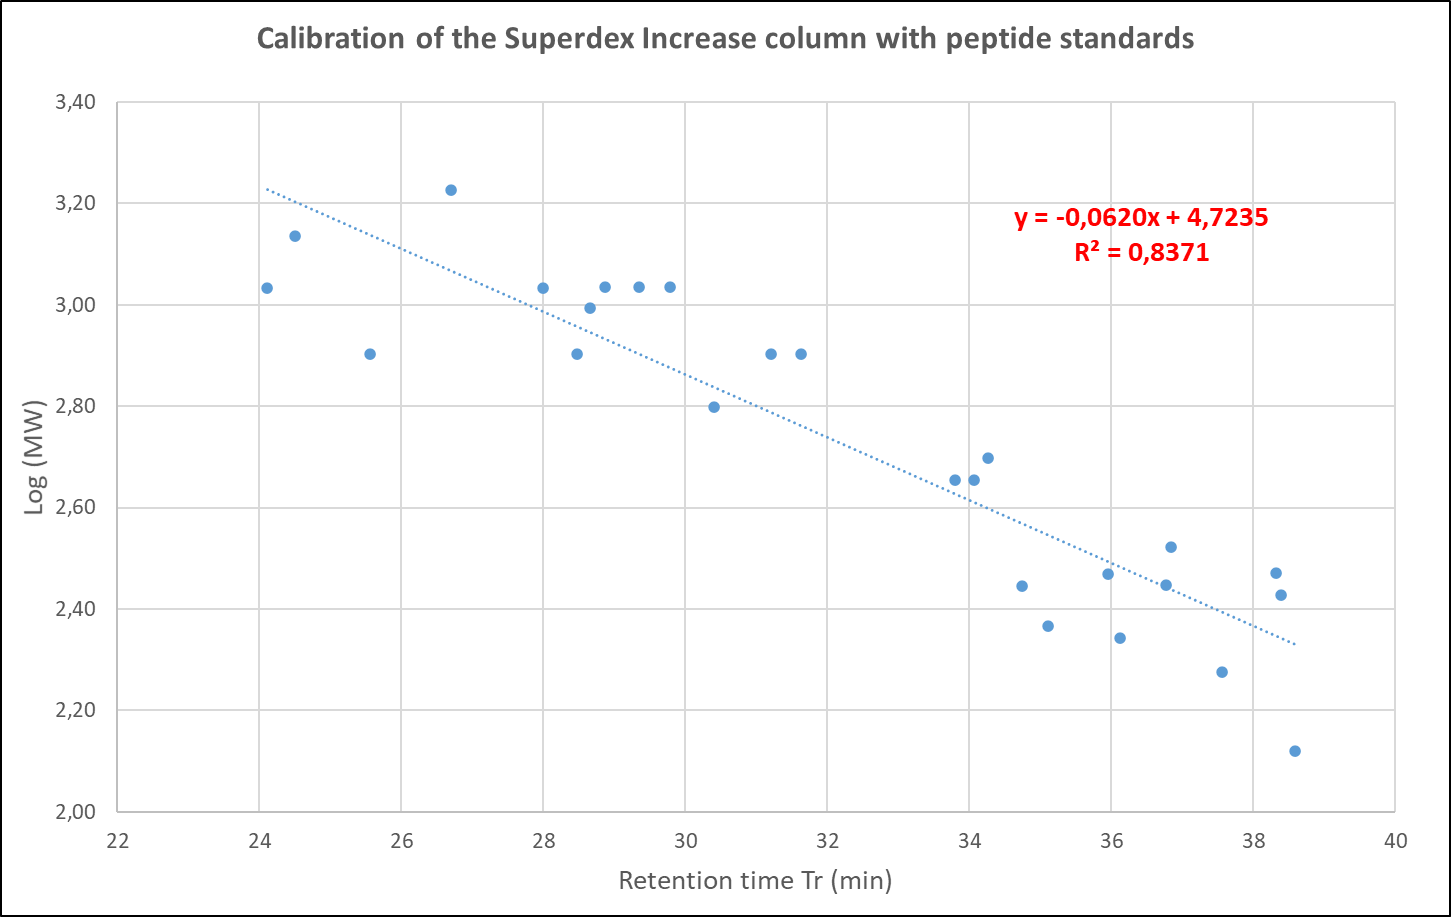


**Fig. 2** Calibration of the Superdex Increase column with peptide standards

**Results of the calibration of the Superdex Increase column – Free Amino Acids**

**Table 3** The retention times and MWs of all 18 free AAs standards

| **Free AAs standards** | **Molecular weights MWs (g/mol)** | **Retention times (min)** |
| --- | --- | --- |
| Leucine (Leu) | 131.18 | 36.367 |
| Isoleucine (Ile) | 131.18 | 36.565 |
| Proline (Pro) | 115.13 | 36.727 |
| Valine (Val) | 117.15 | 36.941 |
| Lysine (Lys) | 146.19 | 37.510 |
| Methionine (Met) | 149.21 | 37.582 |
| Glutamic acid (Glu) | 147.13 | 38.174 |
| Phenylalanine (Phe) | 165.19 | 38.262 |
| Alanine (Ala) | 89.10 | 38.339 |
| Arginine (Arg) | 174.20 | 38.421 |
| Histidine (His) | 155.16 | 38.640 |
| Threonine (Thr) | 119.12 | 38.655 |
| Aspartic acid (Asp) | 133.11 | 39.389 |
| Serine (Ser) | 105.09 | 39.821 |
| Glycine (Gly) | 75.07 | 40.030 |
| Tyrosine (Tyr) | 181.19 | 40.297 |
| Cysteine (C) | 121.16 | 40.807 |
| Cystine (Cys) | 240.30 | 41.991 |
| Tryptophan (W) | 204.23 | 47.087 |

**The boundary retention time between Peptides and FAA (), and the lower () and upper () retention time boundaries delimiting the elution range of the two main fractions of all the 28 investigated keratin protein hydrolysates**

| **Table 4** Hydrolysates from experiments E11 - Elution range of their constitutive Peptide and FAA fractions  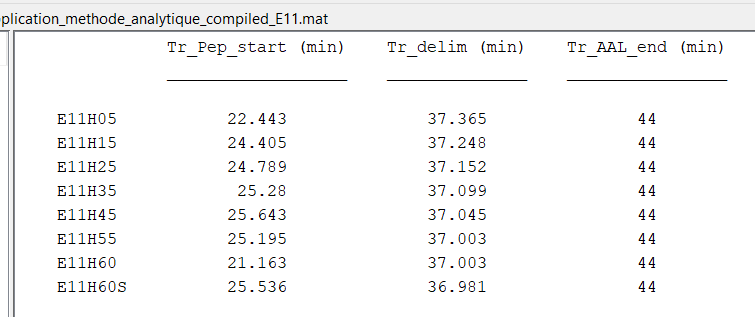 |
| --- |
| **Table 5** Hydrolysates from experiments E12 - Elution range of their constitutive Peptide and FAA fractions  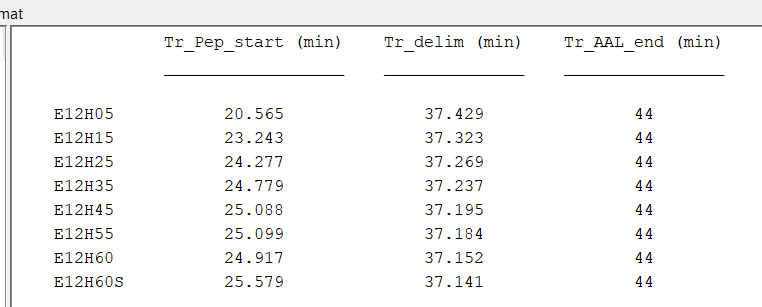 |

| **Table 6** Hydrolysates from experiments E31 - Elution range of their constitutive Peptide and FAA fractions  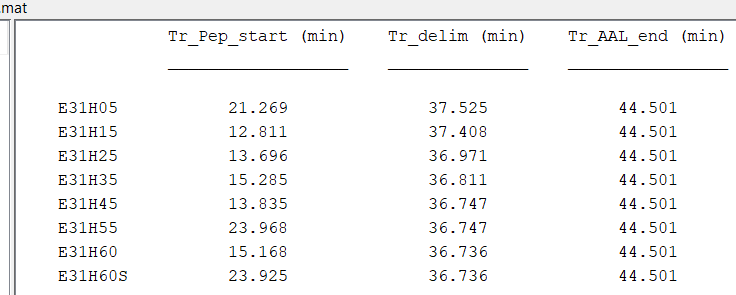 |
| --- |
| **Table 7** Hydrolysates from experiments E32 - Elution range of their constitutive Peptide and FAA fractions  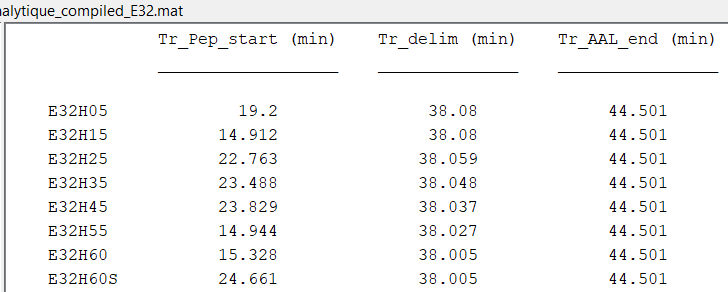 |

**Aminograms of hydrolysates produced in experiments E31 and E32 showing the total concentrations of free AA, total AA and Peptides, and the key parameter deduced from these compositions**

**Table 8** Aminograms of hydrolysates produced in experiments E31 and E32 showing the total concentrations of free AA, total AA and Peptides, and the key parameter deduced from these compositions using Eq. (4)

|  | E31 - Concentrations (g/L) | | | | | | | | | | | | | | E32 - Concentrations (g/L) | | | | | | | | | | | | | |
| --- | --- | --- | --- | --- | --- | --- | --- | --- | --- | --- | --- | --- | --- | --- | --- | --- | --- | --- | --- | --- | --- | --- | --- | --- | --- | --- | --- | --- |
| H05 | | H15 | | H25 | | H35 | | H45 | | H55 | | H60 | | H05 | | H15 | | H25 | | H35 | | H45 | | H55 | | H60 | |
| Free AA | Total AA | Free AA | Total AA | Free AA | Total AA | Free AA | Total AA | Free AA | Total AA | Free AA | Total AA | Free AA | Total AA | Free AA | Total AA | Free AA | Total AA | Free AA | Total AA | Free AA | Total AA | Free AA | Total AA | Free AA | Total AA | Free AA | Total AA |
| Aspartic acid | 7.7 | 13.0 | 10.6 | 13.2 | 11.9 | 13.1 | 12.6 | 12.9 | 12.8 | 12.9 | 12.9 | 12.9 | 13.1 | 13.1 | 4.6 | 13.6 | 6.9 | 13.0 | 9.2 | 14.3 | 9.2 | 13.3 | 9.9 | 13.3 | 11.3 | 13.7 | 11.4 | 11.4 |
| Threonine | 1.7 | 7.7 | 3.5 | 7.9 | 4.8 | 7.8 | 5.7 | 7.7 | 6.2 | 7.7 | 6.5 | 7.4 | 6.7 | 7.3 | 0.8 | 7.9 | 1.5 | 7.7 | 2.4 | 8.4 | 2.9 | 7.9 | 2.8 | 7.8 | 3.8 | 8.5 | 4.2 | 8.1 |
| Serine | 12.1 | 21.4 | 17.1 | 21.6 | 19.4 | 21.4 | 20.7 | 20.8 | 20.9 | 21.0 | 20.6 | 20.6 | 20.5 | 20.5 | 7.6 | 21.6 | 11.0 | 21.0 | 14.7 | 22.9 | 14.7 | 21.3 | 15.6 | 18.4 | 17.8 | 22.3 | 18.3 | 21.4 |
| Glutamic acid | 7.5 | 17.1 | 11.3 | 17.1 | 13.4 | 16.7 | 14.6 | 16.5 | 15.2 | 16.5 | 15.5 | 15.5 | 15.7 | 15.8 | 3.9 | 17.7 | 6.4 | 16.9 | 9.0 | 18.4 | 9.6 | 17.0 | 10.1 | 12.4 | 12.0 | 17.9 | 12.7 | 16.7 |
| Glycine | 13.0 | 20.1 | 16.3 | 20.4 | 17.7 | 20.3 | 17.7 | 19.1 | 18.0 | 19.2 | 17.9 | 18.9 | 18.3 | 19.0 | 8.6 | 20.0 | 11.9 | 19.5 | 14.9 | 21.5 | 13.7 | 19.9 | 14.9 | 18.5 | 16.0 | 18.5 | 16.6 | 19.4 |
| Alanine | 5.5 | 10.9 | 7.9 | 11.0 | 9.2 | 10.7 | 9.7 | 10.4 | 9.9 | 10.3 | 10.3 | 10.6 | 10.4 | 10.7 | 2.6 | 11.0 | 4.8 | 10.5 | 6.7 | 11.4 | 6.7 | 10.8 | 7.1 | 12.3 | 7.7 | 11.0 | 8.4 | 10.7 |
| Valine | 2.6 | 13.5 | 3.7 | 13.5 | 4.8 | 13.5 | 5.8 | 13.2 | 6.7 | 13.1 | 7.2 | 13.0 | 7.5 | 13.0 | 2.2 | 13.8 | 2.6 | 13.5 | 3.1 | 14.9 | 3.0 | 13.8 | 3.1 | 13.5 | 4.0 | 13.6 | 4.2 | 13.3 |
| Cystine | 2.0 | 21.4 | 5.0 | 21.2 | 7.5 | 21.1 | 9.2 | 20.3 | 10.1 | 20.2 | 11.4 | 20.6 | 11.7 | 21.3 | 0.0 | 23.6 | 1.7 | 22.5 | 2.7 | 24.2 | 3.9 | 21.4 | 3.8 | 26.0 | 5.7 | 24.6 | 6.3 | 21.2 |
| Methionine | 0.6 | 0.7 | 0.7 | 0.7 | 0.7 | 0.7 | 0.6 | 0.6 | 0.6 | 0.6 | 0.7 | 0.7 | 0.8 | 0.8 | 1.1 | 1.1 | 1.1 | 1.1 | 1.0 | 1.0 | 0.6 | 0.8 | 0.8 | 0.8 | 0.8 | 0.8 | 0.9 | 0.9 |
| Isoleucine | 1.1 | 8.0 | 2.3 | 8.1 | 2.9 | 8.1 | 3.6 | 7.8 | 4.0 | 7.7 | 4.3 | 7.2 | 4.6 | 7.3 | 0.3 | 8.1 | 0.8 | 7.9 | 1.2 | 8.7 | 1.8 | 8.2 | 1.8 | 8.1 | 2.2 | 8.1 | 2.2 | 8.0 |
| Leucine | 4.6 | 16.5 | 7.9 | 16.5 | 10.1 | 16.4 | 11.3 | 15.7 | 12.2 | 15.5 | 13.1 | 15.1 | 13.3 | 15.2 | 2.4 | 16.8 | 3.9 | 16.2 | 5.8 | 17.7 | 6.5 | 16.4 | 6.6 | 16.5 | 8.7 | 16.4 | 9.2 | 16.3 |
| Tyrosine | 3.8 | 10.0 | 5.8 | 10.2 | 6.9 | 10.2 | 7.8 | 10.2 | 8.2 | 10.0 | 4.6 | 11.6 | 4.5 | 10.6 | 2.5 | 9.9 | 3.7 | 10.0 | 4.9 | 10.9 | 5.0 | 10.0 | 5.1 | 10.1 | 6.1 | 10.4 | 6.5 | 10.5 |
| Phenylalanine | 3.8 | 10.0 | 5.4 | 10.1 | 6.7 | 9.8 | 7.5 | 9.6 | 8.2 | 9.6 | 8.2 | 9.6 | 8.5 | 9.2 | 2.9 | 10.2 | 3.7 | 9.9 | 4.8 | 10.7 | 5.0 | 10.0 | 5.0 | 10.1 | 5.9 | 10.2 | 6.5 | 9.9 |
| Lysine | 1.0 | 3.1 | 1.5 | 3.0 | 2.0 | 2.9 | 2.1 | 2.8 | 2.3 | 2.9 | 2.2 | 2.5 | 2.4 | 2.6 | 0.6 | 3.2 | 0.9 | 3.2 | 1.3 | 3.4 | 1.4 | 3.1 | 1.5 | 2.5 | 1.7 | 2.4 | 1.7 | 2.8 |
| Histidine | 0.5 | 1.5 | 0.8 | 1.4 | 1.0 | 1.3 | 1.1 | 1.2 | 1.2 | 1.2 | 1.0 | 1.0 | 1.0 | 1.0 | 0.0 | 1.8 | 0.7 | 1.8 | 0.8 | 1.8 | 0.7 | 1.5 | 0.7 | 1.4 | 0.9 | 1.6 | 1.1 | 1.5 |
| Arginine | 3.0 | 10.9 | 5.4 | 11.1 | 6.7 | 10.8 | 7.9 | 10.5 | 8.4 | 10.3 | 8.8 | 9.8 | 8.4 | 10.0 | 1.8 | 11.6 | 2.9 | 11.1 | 4.2 | 12.1 | 4.3 | 10.8 | 4.4 | 10.8 | 5.9 | 11.5 | 5.9 | 10.9 |
| Proline | 6.4 | 17.4 | 10.1 | 18.4 | 14.9 | 18.3 | 13.4 | 15.9 | 15.0 | 16.3 | 17.0 | 18.1 | 17.7 | 18.3 | 3.6 | 19.5 | 6.1 | 18.7 | 9.2 | 20.1 | 10.3 | 18.1 | 10.1 | 19.2 | 10.9 | 19.1 | 10.8 | 19.1 |
| **Total (g/L)** | **77** | **203** | **115** | **205** | **140** | **203** | **151** | **195** | **160** | **195** | **162** | **195** | **165** | **196** | **46** | **211** | **71** | **204** | **96** | **222** | **100** | **204** | **103** | **202** | **122** | **211** | **127** | **202** |
| **Peptides (g/L)** | **126** | | **90** | | **63** | | **44** | | **35** | | **33** | | **31** | | **166** | | **134** | | **127** | | **105** | | **99** | | **89** | | **75** | |
|  | **123** | **138** | **127** | **137** | **129** | **137** | **131** | **138** | **132** | **138** | **131** | **138** | **131** | **138** | **120** | **139** | **124** | **139** | **125** | **138** | **127** | **138** | **126** | **140** | **129** | **140** | **129** | **138** |
